# Supplementary material
Source: Royal Society of Chemistry journal article supplement (doi:10.1039/d6fo00765a)
Supplement: d6fo00765a1.pdf [file d6fo00765a1.pdf]

## Supplementary Information

### **Bioaccessibility and Colonic Catabolism of Carotenoids from Mango Purée (cv. Osteen): Comparison of Ileal Fluid Content and Products of *In Vitro* Digestion**

Salud Cáceres-Jiménez<sup>a</sup>, Sara Dobani<sup>b,c</sup>, L. Kirsty Pourshahidi<sup>c</sup>, Chris I.R. Gill<sup>c</sup>, José Luis Ordóñez-Díaz<sup>d</sup>, José Manuel Moreno-Rojas<sup>d,e</sup>, Alan Crozier<sup>f</sup>, Gema Pereira-Caro<sup>d,e\*</sup>

<sup>a</sup>*Departamento de Bromatología y Tecnología de los Alimentos, Campus Rabanales, Universidad de Córdoba, 14071 Córdoba, Spain.*

<sup>b</sup>*Human Nutrition Unit, Department of Food and Drug, University of Parma, Parma, Italy*

<sup>c</sup>*Nutrition Innovation Centre for Food and Health (NICHE), Ulster University, Coleraine, UK*

<sup>d</sup>*Department of Agroindustry and Food Quality, Andalusian Institute of Agricultural and Fisheries Research and Training (IFAPA), 14004 Córdoba, Spain*

<sup>e</sup>*Foods for Health Group, Instituto Maimónides de Investigación Biomédica de Córdoba (IMIBIC), Córdoba, Spain.*

<sup>f</sup>*School of Medicine, Dentistry and Nursing, University of Glasgow, Glasgow G12 8QQ, UK*

\*Corresponding author

Gema Pereira-Caro (mariag.pereira@juntadeandalucia.es)

**Table S1.** Age and gender of the ten ileostomists participants in the study.

| Volunteer ID | Age | Gender |
|--------------|-----|--------|
| S01          | 51  | F      |
| S02          | 34  | M      |
| S03          | 43  | F      |
| S04          | 65  | F      |
| S05          | 56  | M      |
| S06          | 53  | M      |
| S07          | 42  | M      |
| S08          | 33  | M      |
| S09          | 36  | M      |
| S10          | 53  | M      |

**Table S2.** HPLC-DAD details of the identification of carotenoids in mango, ileal fluid after ingestion of mango, and after *in vitro* digestion of mango<sup>1</sup>.

| Carotenoids                       | Retention time (min) | Mango purée | <i>In vitro</i> digested sample | Ileal fluid | Fermented sample | Identification |
|-----------------------------------|----------------------|-------------|---------------------------------|-------------|------------------|----------------|
| <i>Carotenes</i>                  |                      |             |                                 |             |                  |                |
| $\alpha$ -Carotene                | 41.3                 | ✓           | ✓                               | ✓           | ✓                | 2              |
| 9- <i>cis</i> - $\beta$ -Carotene | 42.3                 | –           | –                               | –           | ✓                | 2              |
| $\beta$ -Carotene                 | 46.1                 | ✓           | ✓                               | ✓           | ✓                | 1              |
| <i>Xanthophylls</i>               |                      |             |                                 |             |                  |                |
| Violaxanthin                      | 15.8                 | ✓           | ✓                               | ✓           | ✓                | 1              |
| Neoxanthin                        | 18.8                 | ✓           | ✓                               | ✓           | ✓                | 1              |
| Zeaxanthin                        | 29.2                 | ✓           | ✓                               | ✓           | ✓                | 1              |
| Lutein                            | 26.3                 | ✓           | ✓                               | ✓           | ✓                | 1              |
| $\beta$ -Cryptoxanthin            | 37.6                 | ✓           | –                               | –           | –                | 1              |
| <i>Unknown carotenoids</i>        |                      |             |                                 |             |                  |                |
| PC-1                              | 13.9                 | ✓           | ✓                               | ✓           | ✓                | 2              |
| PC-2                              | 22.5                 | ✓           | ✓                               | ✓           | ✓                | 2              |
| PC-3                              | 47.6                 | ✓           | ✓                               | ✓           | ✓                | 2              |
| PC-4                              | 11.5                 | –           | –                               | –           | ✓                | 2              |
| PC-5                              | 55.3                 | –           | –                               | –           | ✓                | 2              |

<sup>1</sup> Possible carotenoid (PC); detected (✓); not detected (-). Method applied for the identification of HPLC peaks: (1) co-chromatography with standards and (2) tentative identification based on the order of chromatographic elution reported in the literature.
